# Supplementary material for: Spindle assembly checkpoint-dependent mitotic delay is required for cell division in absence of centrosomes
Source: eLife journal article supplement (doi:10.7554/elife.84875), 2023-05-04
Supplement: fig1-data1 [file Figure1a'-source data.xlsx]

## Sheet: Tabelle1
Replicate 1
	RPE1TP53-/-				U2OS
	DMSO	CNONE	Untreated	SASS6-/-	DMSO	CNONE
0 centrioles (proportion cells)	0	0.959184	0.0222222	1	0	0.88
1 centriole	0.025	0.0408163	0.0444444	0	0.02	0.08
2+ centrioles	0.98	0	0.955556	0	0.98	0.04
n=	50	49	45	56	50	50
Replicate 2
	RPE1TP53-/-				U2OS
	DMSO	CNONE	Untreated	SASS6-/-	DMSO	CNONE
0 centrioles	0	0.941176	0	1	0	0.82
1 centriole	0.1	0.0392157	0	0	0.04	0.14
2+ centrioles	0.92	0.0196078	1	0	0.96	0.04
n=	50	51	55	44	50	50
