# Supplementary material for: Spindle assembly checkpoint-dependent mitotic delay is required for cell division in absence of centrosomes
Source: eLife journal article supplement (doi:10.7554/elife.84875), 2023-05-04
Supplement: fig1-data1 [file Figure1b'-source data.xlsx]

## Sheet: Tabelle1
NEBD-anaphase onset							Anaphase/telophase/cytokinesis
RPE1TP53-/-				U2OS			RPE1TP53-/-				U2OS
DMSO	CNONE	Untreated	SASS6-/-	DMSO	CNONE		DMSO	CNONE	Untreated	SASS6-/-	DMSO	CNONE
25	60	10	90	24	91		18	12	20	15	13	9
20	216	10	150	17	66		15	9	20	20	7	7
15	39	10	110	24	96		12	9	20	10	7	6
20	84	20	170	25	24		12	9	20	10	20	6
20	33	30	30	38	38		21	6	10	20	12	6
20	18	40	70	17	52		12	12	20	20	12	9
20	146	15	80	24	75		12	12	10	10	9	15
20	41	10	30	17	340		12	12	10	20	9	25
15	83	15	70	17	66		9	9	10	20	9	15
20	47	15	95	17	60		9	9	10	15	12	9
15	38	15	75	28	48		12	12	10	10	12	9
15	29	15	40	12	70		9	9	5	10	9	9
10	62	8	45	17	21		9	9	15	10	9	6
15	32	5	141	17	66		9	9	15	15	9	6
15	41	2	36	13	173		6	6	15	10	9	9
5	32	11	78	42	38		9	9	10	15	6	6
30	50	17	42	25	94		9	9	10	10	6	9
15	215	8	33	14	77		9	9	15	10	9	6
15	38	8	24	12	157		9	9	10	5	9	9
20	83	8	57	28	132		21	6	10	25	9	9
20	32	5	27		58		15	6				12
15	14	5	36		33.75		10	18				12
15	80	17	27		57		5	21				15
15	83	10	45		81		5	9
20	80	5	70		89		10	9
15	83	5	115		89			15
	59	10	10		128
	62	10	45		75
	80	10	45		350
	57	15	45		66
	52	15	45		54
		10	50		42
		0	70		64
		15	50		12
		10	65		57
		10	75		167
		20	40		32
		15	25		88
		5	30		68
		10	60		151
		5	35		126
		10	45		41
		15	35		165
		10	95		165
		10	15		75
		10	20		48
		20	85
		20	80
		20	90
		30	155
		30	105
		40	165
		20	35
		20	75
		20	75
		30	35
		30	75
		50	75
		15	35
		10	75
		15	95
		15	70
		15	35
		10	40
