# Supplementary material for: Spindle assembly checkpoint-dependent mitotic delay is required for cell division in absence of centrosomes
Source: eLife journal article supplement (doi:10.7554/elife.84875), 2023-05-04
Supplement: fig1-data1 [file Figure1c'-source data.xlsx]

## Sheet: Tabelle1
														Key:
RPE1TP53-/-									U2OS					DMSO treated
DMSO	DMSO	CNONE	CNONE	Untreated	Untreated	SASS6-/-	SASS6-/-		DMSO	DMSO	CNONE	CNONE		CFI treated
20	18	156	15	18	18	156	30		27	15	73	14
30	18	51	21	15	18	51	40		27	9	48.75	19
30	16	93	24	12	16	93	51		14	11	72	19
20	16	57	30	21	16	57	30		38	10	96	14
40	20	48	60	27	20	48	48		28	21	104	20
90	14	39	15	18	14	39	51		28	14	104	10
60	18	72	37	18	18	72	21		25	21	143	12
30	18	42	39	18	18	42	33		38	15	90	28
40	15	51	21	15	15	51	21		41	9	365	12
20	14	42	27	15	14	42	21		39	11	81	14
30	18	60	27	27	18	60	33		53	10	69	19
20	24	225	30	20	18	85	27		58	21	57	19
30	24	48	36	15	18	130	39		29	14	79	14
60	68	93	21	15	16	25	12		36.5	21	27	20
30	46	42	30	20	16	60	21		26	21	72	10
40	24	24	21	20	20	60	33		26	9	182	12
30	16	90	27	20	14	60	21		26	14	47	28
30	36	93	9	25	18	60	27		40	10	103	12
30	16	90	21	25	18	65	36		24	21	83	19
40	20	93	27	20	15	85	15		26	21	166	20
30	24	69	33	10	14	65	24		26.5	9	141	10
30	24	72	21	25	18	80	8		51	11	56	24
25	12	90	24	20	24	90	30		22	9	180	10
30	18	72	27	20	24	55	30		31	21	180	20
25				30	68	40	18		20	14	90	12
25				25	46	45	12		21		63
20				15	24	75	18		37
25				20	16	50	15
25				15	36	60	24
10				20	16	50	12
40				25	20	110	24
25				20	24	30
25				20	24	35
30				20	18	100
40				30	12	95
30				30	12	105
25				30	15	170
20				40	18	120
25				40	21	180
25				50	9	50
				30		90
				30		90
				30		50
				40		90
				40		90
				60		50
				25		90
				20		110
				25		85
				25		50
				25		55
				20
