# Supplementary material for: Spindle assembly checkpoint-dependent mitotic delay is required for cell division in absence of centrosomes
Source: eLife journal article supplement (doi:10.7554/elife.84875), 2023-05-04
Supplement: fig1-data1 [file Figure1d,f-source data.xlsx]

## Sheet: Tabelle1
	RPE1 TP53-/- DMSO	RPE1 TP53-/- CNONE	RPE1 TP53-/- DMSO CFI-402257	RPE1 TP53-/- CNONE CFI-402257	RPE1 TP53-/- DMSO proTAME	RPE1 TP53-/- CNONE proTAME	RPE1 TP53-/- DMSO CFI-402257 + proTAME	RPE1 TP53-/- CNONE CFI-402257 + proTAME	RPE1 TP53-/-	RPE1 TP53-/- ; SASS6-/-	RPE1 TP53-/- CFI-402257	RPE1 TP53-/- ;SASS6-/- CFI-402257	RPE1 TP53-/- proTAME	RPE1 TP53-/- ;SASS6-/- proTAME	RPE1 TP53-/- CFI-402257 + proTAME	RPE1 TP53-/- SASS6-/- CFI-402257 + proTAME	U2OS DMSO	U2OS CNONE	DMSO CFI-402257	CNONE CFI-402257	DMSO proTAME	CNONE proTAME	DMSO CFI-402257 + proTAME	CNONE CFI-402257+proTAME
No Division		1		60		1	8	4	3		3	43	3	4	4	5		2	9	39	2	1	2	6
2 Daughters	50	48	40	4	18	5	4	4	59	50	59	9	9	10	4	3	49	40	37	4	2	1	6	11
3+ Daughters		1	6						1			4	3				1	2
Death					2	5												3	3	4	6	4	2	2
Mitotic Arrest					41	29	62	68		1		2	51	49	41	39		2			45	34	61	59
n=	50	50	46	64	61	40	74	76	63	51	62	58	66	63	49	47	50	49	49	47	55	40	71	78
