# Supplementary material for: Spindle assembly checkpoint-dependent mitotic delay is required for cell division in absence of centrosomes
Source: eLife journal article supplement (doi:10.7554/elife.84875), 2023-05-04
Supplement: fig1-figsupp1-data1 [file Figure1 supplement 1a-source data.xlsx]

## Sheet: Tabelle1
	MPS1 IN-1
	RPE1TP53-/-				U2OS
	DMSO	CNONE	Untreated	SASS6-/-	DMSO	CNONE
No Division		45		37		35
2 Daughters	38	1	60	2	41	3
3+ Daughters	3		5		10
Death		2	1	1		3
Mitotic Arrest		1		1
n=	41	49	66	41	51	41
