# Supplementary material for: Spindle assembly checkpoint-dependent mitotic delay is required for cell division in absence of centrosomes
Source: eLife journal article supplement (doi:10.7554/elife.84875), 2023-05-04
Supplement: fig1-figsupp2-data1 [file Figure1 supplement 2a-source data.xlsx]

## Sheet: Tabelle1
	p53 dmso	p53 cfi	sass6 dmso	sass6 cfi
Normal	93	92	90	6
Taurus	1	3	1	29
Incomplete Taurus		4	1	26
Multilobed	6	13	8	40
Binucleate				2
Multinucleate	1	4		26
Micronuclei			6	2
n=	101	116	106	131
