# Supplementary material for: Spindle assembly checkpoint-dependent mitotic delay is required for cell division in absence of centrosomes
Source: eLife journal article supplement (doi:10.7554/elife.84875), 2023-05-04

**Molecular Weight (kDa)**

250  
150  
100  
75  
50  
37  
25  
20  
15

**Ladder**

**Cas9 transfected**

**Unedited**

**Edited clone**

**Cas9 (163 kDa)**

**Unknown band**

**Cas9  
immunoblot**

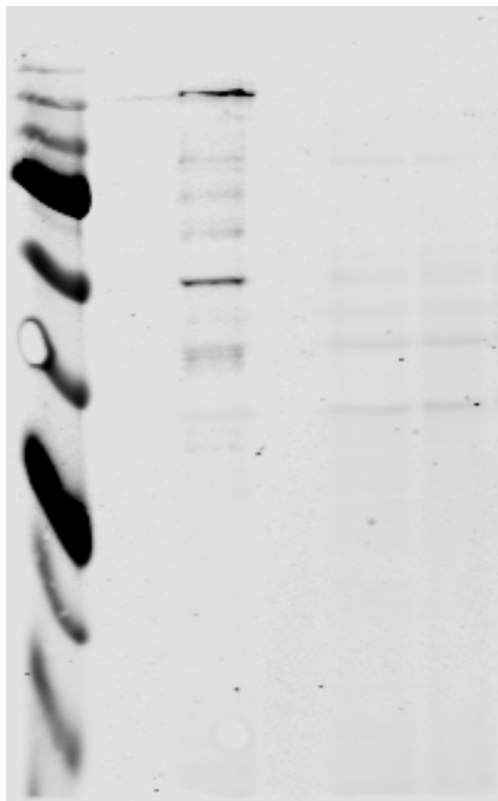

Supplement: fig1-figsupp3-data1 [file elife-84875-fig1-figsupp3-data1-v1.zip]
