# Supplementary material for: Spindle assembly checkpoint-dependent mitotic delay is required for cell division in absence of centrosomes
Source: eLife journal article supplement (doi:10.7554/elife.84875), 2023-05-04
Supplement: fig1-figsupp4-data1 [file Figure1 supplement 4a'-source data.xlsx]

## Sheet: Tabelle1
Replicate 1
	RPE1TP53-/-		U2OS
	10d DMSO + 10d washout	10d CNONE + 10d washout	10d DMSO + 10d washout	10d CNONE + 10d washout
0-1 centriole/s	2	2	2	1
2-4 centrioles	50	53	47	41
5+ centrioles	1	3	5	8
n=	53	58	54	50
Replicate 2
	RPE1TP53-/-		U2OS
	10d DMSO + 10d washout	10d CNONE + 10d washout	10d DMSO + 10d washout	10d CNONE + 10d washout
0-1 centriole/s	0	1	3	3
2-4 centrioles	47	47	42	47
5+ centrioles	4	2	6	6
n=	51	50	51	56
