# Supplementary material for: Spindle assembly checkpoint-dependent mitotic delay is required for cell division in absence of centrosomes
Source: eLife journal article supplement (doi:10.7554/elife.84875), 2023-05-04
Supplement: fig1-figsupp4-data1 [file Figure1 supplement 4b-source data.xlsx]

## Sheet: Tabelle1
RPE1TP53-/-		U2OS
DMSO 10dwo	cnone 10dwo	DMSO 10dwo	cnone 10dwo
36	36	18	15
42	39	12	15
30	54	36	15
36	42	12	21
45	33	18	12
51	27	15	21
42	54	18	18
30	30	18	27
30	24	18	21
39	12	15	21
27	33	27	21
30	30	33	21
27	45	18	24
21	24	30	24
39	27	24	27
198	30	18	21
27	63	21	24
27	36	27	29
30	30	27	36
39	27	14	26
45	24	38	26
18	18	28	26
15	18	28	40
12	18	25	24
21	15	38	26
27	15	41	26
	27	39	51
		53
