# Supplementary material for: Spindle assembly checkpoint-dependent mitotic delay is required for cell division in absence of centrosomes
Source: eLife journal article supplement (doi:10.7554/elife.84875), 2023-05-04
Supplement: fig1-figsupp4-data1 [file Figure1 supplement 4c-source data.xlsx]

## Sheet: Tabelle1
	DMSO		CFI402257		DMSO		CFI402257
	RPE1TP53-/-				U2OS
	DMSO WO	CNONE WO	DMSO WO	CNONE WO	DMSO WO	CNONE WO	DMSO WO	CNONE WO
No Division		1
2 Daughters	40	50	48	47	40	42	43	40
3+ Daughters
Death		1		1
Mitotic Arrest	1	1			1
n=	41	53	48	48	41	42	43	40
