# Supplementary material for: Spindle assembly checkpoint-dependent mitotic delay is required for cell division in absence of centrosomes
Source: eLife journal article supplement (doi:10.7554/elife.84875), 2023-05-04
Supplement: fig2-data1 [file Figure2a''-source data.xlsx]

## Sheet: Tabelle1
	TP53-/- + DMSO			p53 cnone			p53			sass6			u2os dmso			u2os cnone
	DMSO	AZD	AZD&CFI	DMSO	AZD	AZD&CFI	DMSO	AZD	AZD&CFI	DMSO	AZD	AZD&CFI	DMSO	AZD	AZD&CFI	DMSO	AZD	AZD&CFI
1		2	6		3	36		3	9		1	38		1	4		8	31
2	54	41	37	51	37	7	50	144	41	50	37	11	61	45	41	72	45	13
3+	1		2			2		1	3			2	1	5	5			2
MA		9	3		12			21	1		8			9	2		16
death		1	2			6		3	8		1	3					1	4
n=	55	53	50	51	52	51	50	172	62	50	47	54	62	60	52	72	70	50
