# Supplementary material for: Spindle assembly checkpoint-dependent mitotic delay is required for cell division in absence of centrosomes
Source: eLife journal article supplement (doi:10.7554/elife.84875), 2023-05-04
Supplement: fig2-data1 [file Figure2a-source data.xlsx]

## Sheet: Tabelle1
	p53 cnone			p53			sass6			u2os dmso			u2os cnone
AZD&CFI	DMSO	AZD	AZD&CFI	DMSO	AZD	AZD&CFI	DMSO	AZD	AZD&CFI	DMSO	AZD	AZD&CFI	DMSO	AZD	AZD&CFI
20	105	140	40	18	28	28	156	100	24	27	28	28	73	100	24
24	170	80	24	15	48	20	51	88	36	27	48	20	48.75	88	36
24	120	60	24	12	52	24	93	132	28	14	52	24	72	132	28
20	180	84	20	21	48	24	57	20	28	38	48	24	96	20	28
20	50	100	28	27	40	28	48	164	32	28	40	28	104	164	32
20	90	64	20	18	38	32	39	76	24	28	38	32	104	76	24
24	90	68	24	18	80	32	72	104	32	25	80	32	143	104	32
28	50	60	28	18	76	20	42	108	36	38	76	20	90	108	36
20	90	64	32	15	120	24	51	104	28	41	120	24	365	104	28
36	110	100	24	15	36	24	42	72	32	39	36	24	81	72	32
16	85	104	28	27	32	24	60	100	20	53	32	24	69	100	20
16	50	108	20	20	40	20	85	152	40	58	40	20	57	152	40
24	55	160	24	15	124	28	130	48	20	29	124	28	79	48	20
24	156	120	24	15	76	28	25	76	28	37	76	28	27	76	28
24	46	98	24	20	108	24	60	68	28	26	108	24	72	68	28
24	93	44	24	20	68	24	60	112	28	26	68	24	182	112	28
24	52	44	24	20	72	28	60	132	36	26	72	28	47	28	36
28	43	44	20	25	60	20	60	132	40	40	60	20	103	48	40
28	29	60	28	25	88	20	65	48	28	24	88	20	83	52	24
28	82	56	28	20	92	16	85	92	44	26	92	24	166	48	24
28	27	100	28	10	76	16	65	60	36	26	44	24	141	136	20
20	36	80	32	25	92	12	80	60	18	51	48	20	56	60	28
24	27	84	32	20	54	20	90	60	28	22	52	20	180	60	20
24	45	76	24	20	54	18	55	136	32	31	40	20	180	84	24
	70	76	36	30	100	24	40	60	36	20	44	24	90	100	28
	115	72	36	25	64	32	45	60	44	21	48	28	63	116	32
	10	220	32	15	440	24	75	84	28	37	52	20		168	24
	45			20	40		50	100			32	36		56	28
	45			15	116		60	116			28	16		114	20
	45			20	88		50	168				16		56	24
	45			25	40		110	56				24		204	24
	225			20	42		30	114				24		136	24
	48			20	40		35	56				24		92	24
	93			20	48		100	204				24
	42			30	80		95	136
	24			30	104		105	92
				30			170
				40			120
				40			180
				50			50
				30			90
				30			90
				30			50
				40			90
				40			90
				60			50
				25			90
				20			110
				25			85
				25			50
				25			55
				20
