# Supplementary material for: Spindle assembly checkpoint-dependent mitotic delay is required for cell division in absence of centrosomes
Source: eLife journal article supplement (doi:10.7554/elife.84875), 2023-05-04
Supplement: fig2-data1 [file Figure2b''-source data.xlsx]

## Sheet: Tabelle1
	CFI + proTAME
	RPE1TP53-/-				U2OS
	DMSO	CNONE	Untreated	SASS6-/-	DMSO	CNONE
No Division		1	1	1
2 Daughters	25	26	31	29	20	20
3+ Daughters		1				1
Death
Mitotic Arrest
n=	25	28	32	30	20	21
