# Supplementary material for: Spindle assembly checkpoint-dependent mitotic delay is required for cell division in absence of centrosomes
Source: eLife journal article supplement (doi:10.7554/elife.84875), 2023-05-04
Supplement: fig2-data1 [file Figure2b-source data.xlsx]

## Sheet: Tabelle1
CFI + proTAME
RPE1TP53-/-				U2OS
DMSO	CNONE	Untreated	SASS6-/-	DMSO	CNONE
428	572	616	744	384	444
784	488	692	1068	468	444
315	560	888	888	648	612
368	934	972	972	672	716
720	812	664	716	716	692
894	614	580	548	548	548
736	326	492	492	492	512
600	1100	416	416	416	392
624	1040	748	748	748	628
760	764	1132	1136	536	492
840	642	508	524	524	496
920	512	440	444	444	564
556	454	380	436	436	492
648	492	816	796	796	752
942	416	524	492	492	632
876	606	616	604	604	536
400	522	988	988	988	988
380	594	404	1064	824	464
510	968	448	504	504	384
484	846	956	956	716	692
840	648	424	424	424	484
371	360	480	480	480	420
424	1134	808	928	628	364
776	1074	552	552	552	584
950	798	796	616	616	552
