# Supplementary material for: Spindle assembly checkpoint-dependent mitotic delay is required for cell division in absence of centrosomes
Source: eLife journal article supplement (doi:10.7554/elife.84875), 2023-05-04
Supplement: fig3-data1 [file Figure3c'-source data.xlsx]

## Sheet: Tabelle1
	RPE1 tp53 null Bleb WO + CFI
	Mononucleate	Binucleate
No Division		2
2 Daughters	50	32
3+ Daughters		14
Death
Mitotic Arrest
n=	50	48
