# Supplementary material for: Spindle assembly checkpoint-dependent mitotic delay is required for cell division in absence of centrosomes
Source: eLife journal article supplement (doi:10.7554/elife.84875), 2023-05-04
Supplement: fig4-data1 [file Figure4b'-source data.xlsx]

## Sheet: Tabelle1
	RPE1 TP53-/- DMSO	RPE1 TP53-/- CFI-402257	RPE1 TP53-/- 5uM STLC	RPE1 TP53-/- 5uM STLC + CFI-402257 (1uM)	U2OS DMSO	U2OS CFI-402257	U2OS 5uM STLC	U2OS 5uM STLC + CFI-402257 (1uM)
No Division				41		9		47
2 Daughters	59	44		1	50	39	1	4
3+ Daughters	1	7		1
Death				2		3
Mitotic Arrest			50				60
n=	60	51	50	45	50	51	61	51
