# Supplementary figures and images for: Spindle assembly checkpoint-dependent mitotic delay is required for cell division in absence of centrosomes
Source: eLife journal article supplement (doi:10.7554/elife.84875), 2023-05-04

Size (kilobasepairs)

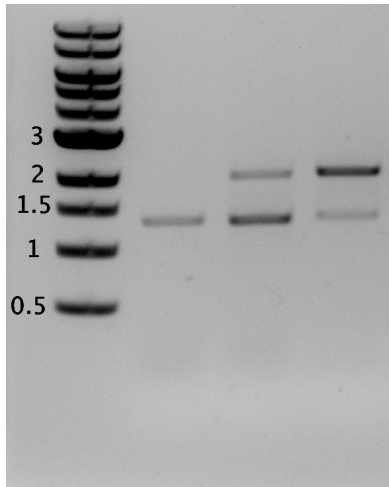

*mEGFP-TUBA1B*

Unedited *TUBA1B*

Supplement: fig1-figsupp3-data1 [file elife-84875-fig1-figsupp3-data1-v1.zip]

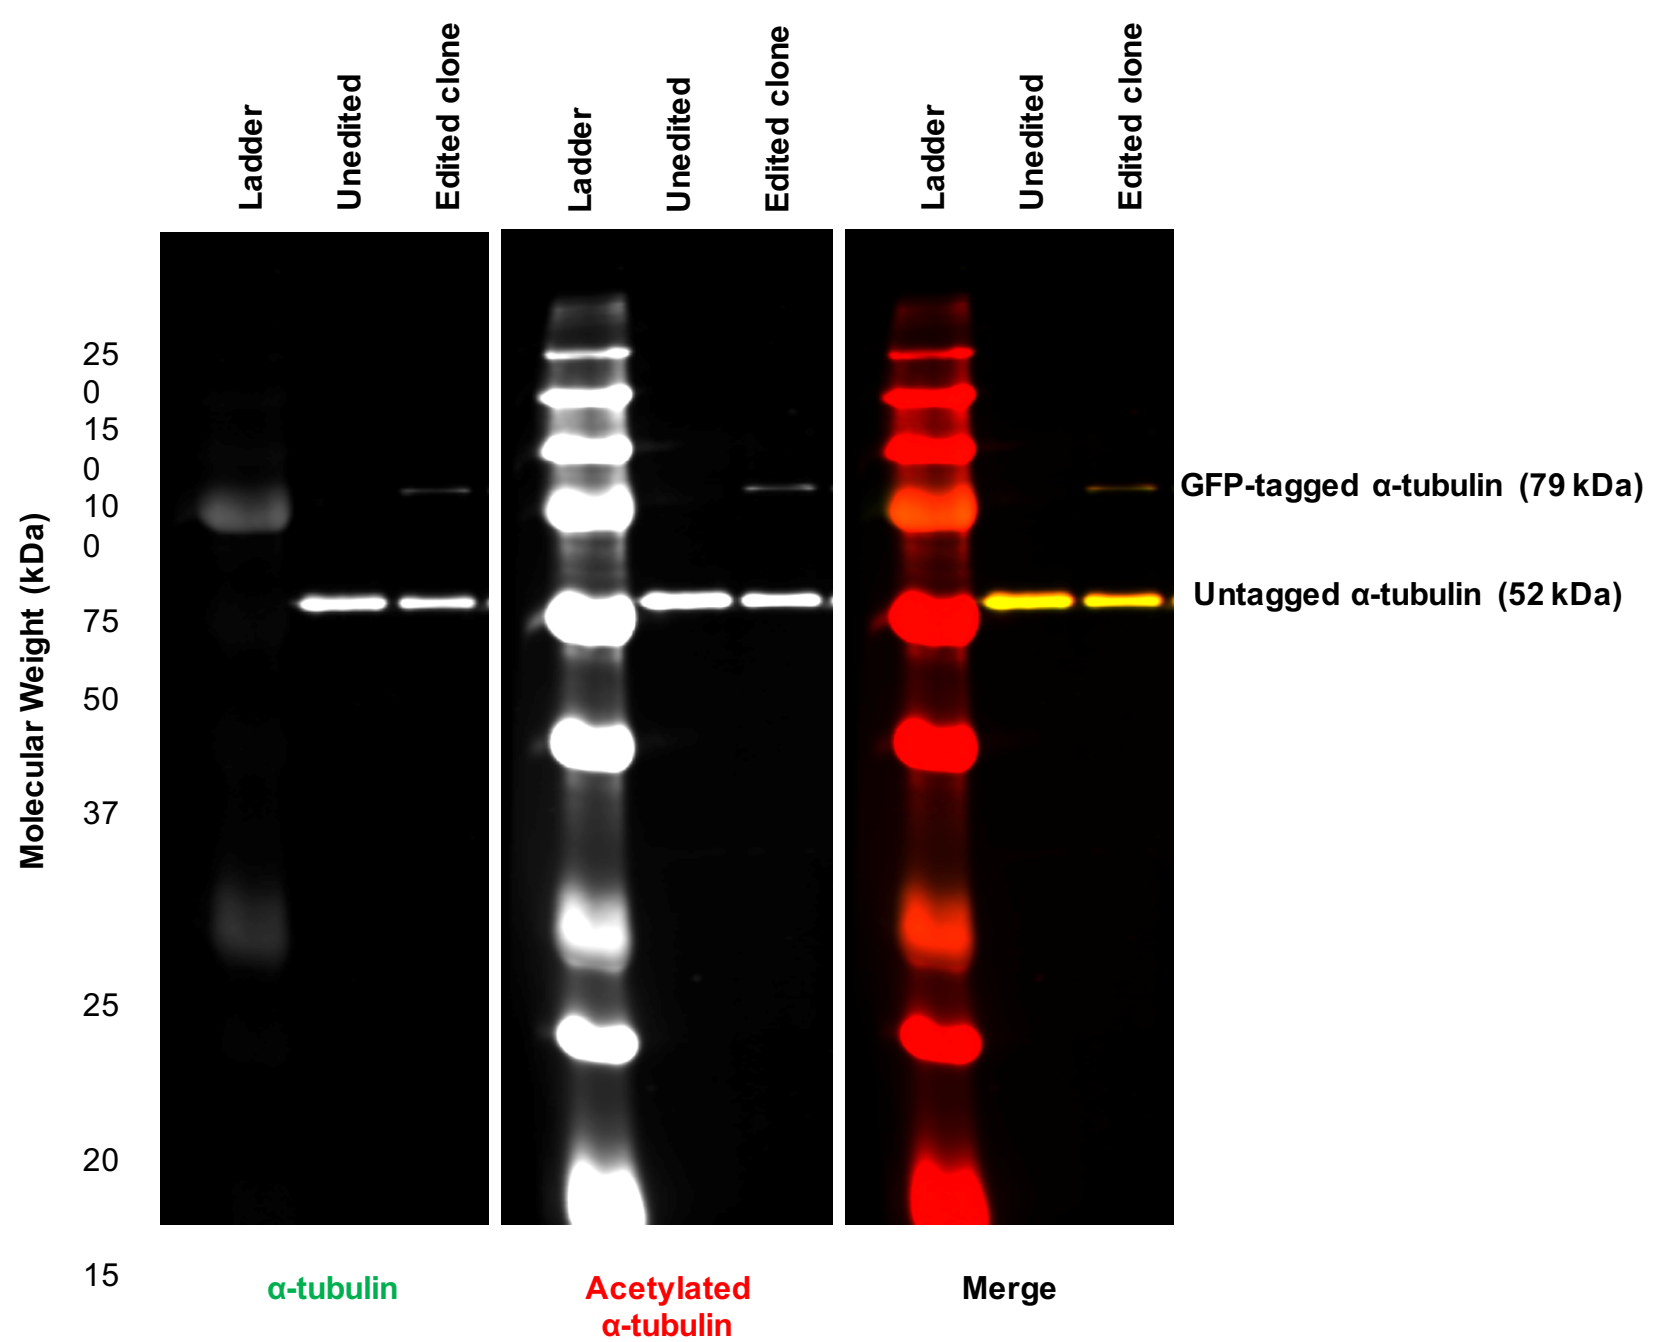

Supplement: fig1-figsupp3-data1 [file elife-84875-fig1-figsupp3-data1-v1.zip]

Molecular Weight (kDa)

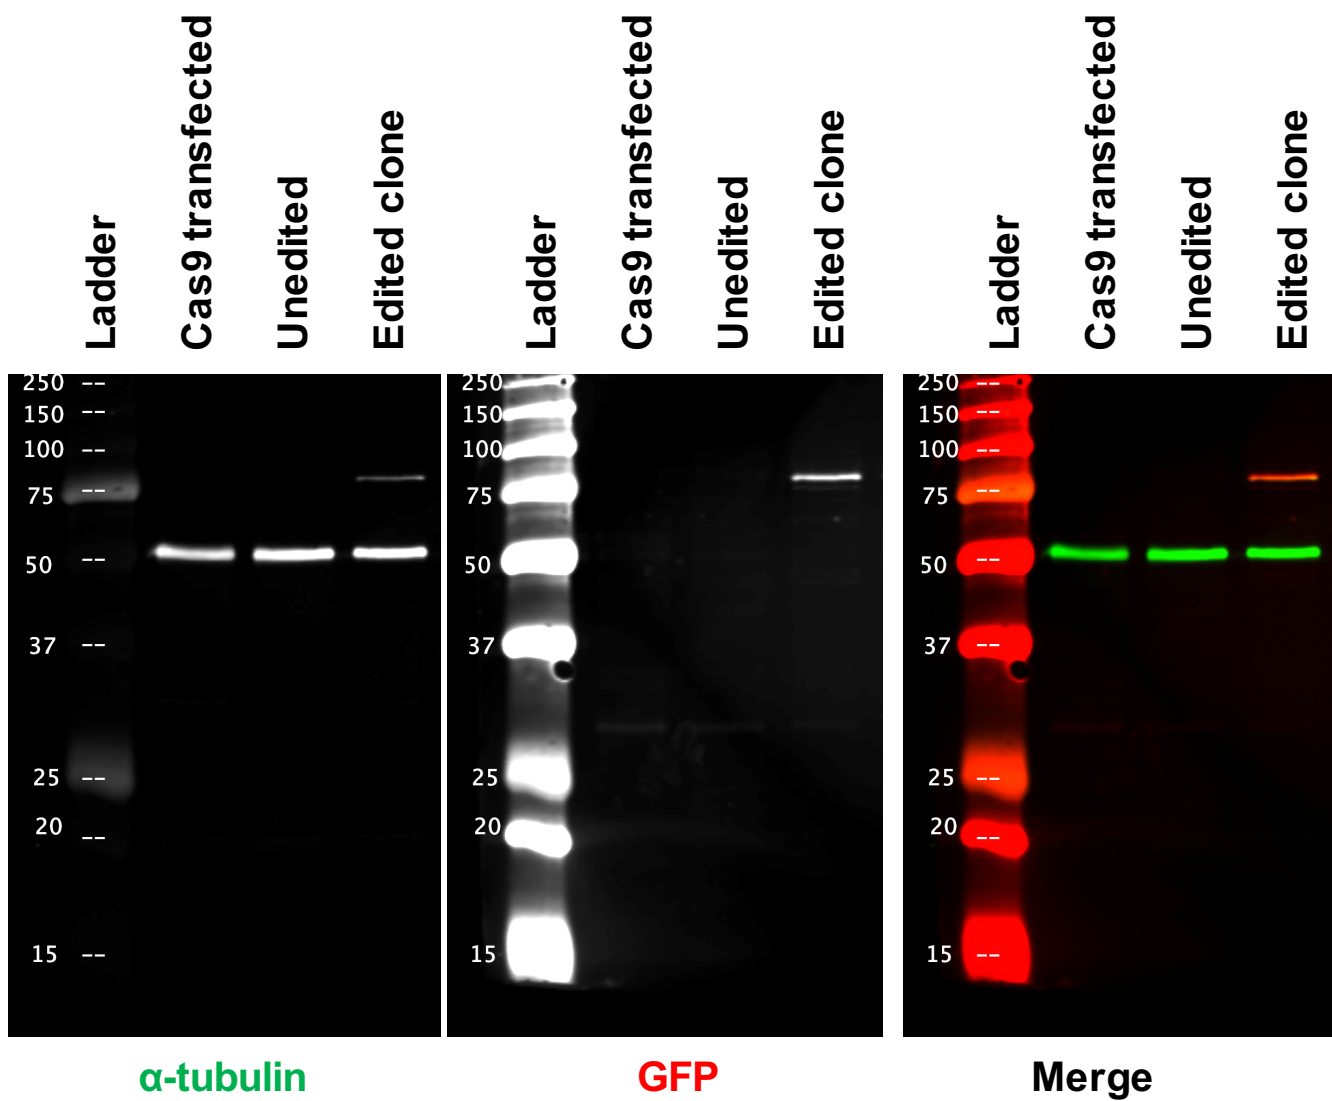

GFP-tagged  $\alpha$ -tubulin (79 kDa)

Untagged  $\alpha$ -tubulin (52 kDa)

Supplement: fig1-figsupp3-data1 [file elife-84875-fig1-figsupp3-data1-v1.zip]
